# Supplementary material for: Excipient Impact on Fenofibrate Equilibrium Solubility in Fasted and Fed Simulated Intestinal Fluids Assessed Using a Design of Experiment Protocol
Source: MDPI journal article supplement (doi:10.3390/pharmaceutics15102484), 2023-10-17
Supplement: s1 [file s1]

## Supplementary Material

### The excipients' impact on fenofibrate equilibrium solubility in fasted and fed simulated intestinal fluids assessed using a design of experiment protocol

Supplementary Figure S1. Chemical Structures.

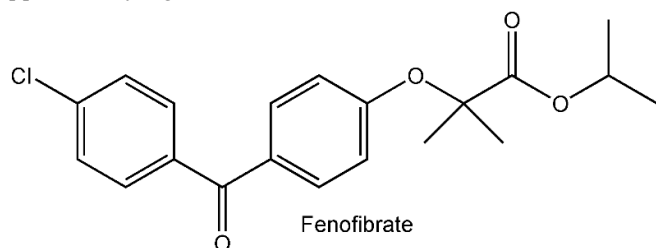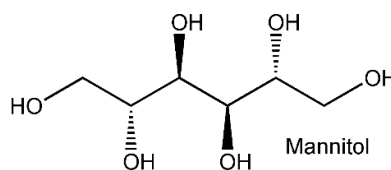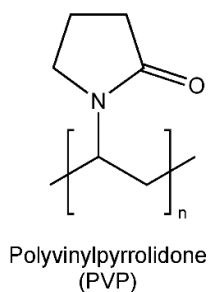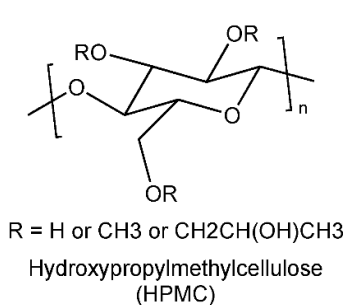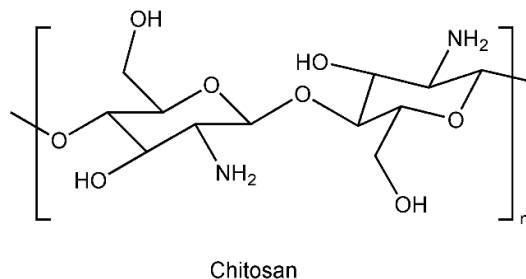

Supplementary Table S1. Stock mixture concentrations (15x lower, mid and upper limits).

| Component     | Fasted State |         |         | Fed State |         |         |
|---------------|--------------|---------|---------|-----------|---------|---------|
|               | Lower        | Middle  | Upper   | Lower     | Middle  | Upper   |
| Bile salt     | 22.5 mM      | 55.5 mM | 88.5 mM | 54.0 mM   | 140 mM  | 225 mM  |
| Lecithin      | 3 mM         | 7.12 mM | 11.2 mM | 7.50 mM   | 31.8 mM | 56.2 mM |
| Monoglyceride | 1.50 mM      | 21.8 mM | 42.0 mM | 15.0 mM   | 75.0 mM | 135 mM  |
| Cholesterol   | 1.50 mM      | 2.70 mM | 3.90 mM | 1.95 mM   | 8.48 mM | 15.0 mM |

Supplementary Table S2. Fatty acid volumes (5x upper limit).

| Component     | Fasted State |        |        | Fed State |          |        |
|---------------|--------------|--------|--------|-----------|----------|--------|
|               | Lower        | Middle | Upper  | Lower     | Middle   | Upper  |
| Sodium Oleate | 16 µL        | 248 µL | 480 µL | 25.6 µL   | 412.8 µL | 800 µL |

Supplementary Table S3. Excipients and Concentrations added to DoE Systems.

|            | Excipient Concentration (mM) |      |      |      |
|------------|------------------------------|------|------|------|
|            | Fasted                       |      | Fed  |      |
| Excipient  | Low                          | High | Low  | High |
| Mannitol   | 7.32                         | 73.3 | 9.67 | 96.7 |
| PVP K12    | 7.36                         | 73.7 | 9.73 | 97.3 |
| PVP K29/32 | 7.35                         | 73.5 | 9.71 | 97.1 |
| HPMC E3    | 7.35                         | 73.5 | 9.71 | 97.1 |
| HPMC E50   | 6.27                         | 62.6 | 8.50 | 85.0 |
| Chitosan   | 6.64                         | 66.3 | 9.00 | 90.0 |
